# Supplementary material for: Non-invasive intravoxel incoherent motion MRI in prediction of histopathological response to neoadjuvant chemotherapy and survival outcome in osteosarcoma at the time of diagnosis
Source: Springer Nature journal article supplement (doi:10.1186/s12967-022-03838-1), 2022-12-27

## Additional file

**Table S1:** Histogram parameters of Apparent diffusion coefficient (*ADC*), Diffusion-coefficient (*D*), Perfusion-coefficient (*D\**) & Perfusion-fraction (*f*) observed in different response groups: Good-response (GR) and poor-response (PR) at time points t0 (before chemotherapy), t1 (after 1<sup>st</sup> cycle of chemotherapy) and t2 (after completion of chemotherapy) and their relative percentage changes between time points t0 & t1 ( $\Delta I$ ) and t0 & t2 ( $\Delta II$ ). Significant values ( $p < 0.05$ ) are in bold.

|                             | Good-response (n=13)           |                               |                               |                |                 | Poor-response (n=22)            |                               |                                |                |                 |
|-----------------------------|--------------------------------|-------------------------------|-------------------------------|----------------|-----------------|---------------------------------|-------------------------------|--------------------------------|----------------|-----------------|
|                             | t0                             | t1                            | t2                            | $\Delta I$ (%) | $\Delta II$ (%) | t0                              | t1                            | t2                             | $\Delta I$ (%) | $\Delta II$ (%) |
| <b>ADC</b>                  |                                |                               |                               |                |                 |                                 |                               |                                |                |                 |
| Mean                        | <b>1.30±0.29<sup>**</sup></b>  | <b>1.53±0.28<sup>*†</sup></b> | <b>1.66±0.21<sup>#</sup></b>  | 20.08±20.24    | 31.35±21.99     | <b>1.41±0.36<sup>**</sup></b>   | <b>1.74±0.32<sup>*†</sup></b> | <b>1.75±0.30<sup>#</sup></b>   | 29.0±31.17     | 30.01±33.74     |
| SD (10 <sup>-1</sup> )      | 4.1±0.06                       | 4.37±0.06                     | 4.7±0.04                      | 7.87±17.94     | 21.09±34.06     | 4.6±1.1                         | 4.41±1.03                     | 4.55±1.26                      | -1.18±19.72    | 3.35±27.52      |
| Skewness                    | <b>0.87±0.51<sup>**</sup></b>  | <b>0.09±0.56<sup>*</sup></b>  | <b>-0.27±0.43<sup>#</sup></b> | -72.74±72.42   | -112.3±85.95    | <b>0.57±0.67<sup>**</sup></b>   | <b>-0.12±0.74<sup>*</sup></b> | <b>-0.22±0.60<sup>#</sup></b>  | -31.98±54.66   | -56.83±284.8    |
| Kurtosis                    | 4.50±1.57                      | 3.86±1.70                     | 3.38±0.63                     | -8.61±39.17    | -15.82±34.14    | 4.41±2.15                       | 4.21±1.24                     | 4.01±0.98                      | 6.80±41.29     | 1.58±36.17      |
| Energy (10 <sup>-3</sup> )  | 1.45±0.33                      | 1.22±0.44                     | 1.14±0.25                     | -14.20±28.51   | -17.79±26.74    | 1.59±1.12                       | 1.26±0.33                     | 1.49±0.78                      | -6.22±28.68    | 17.25±86.04     |
| Entropy                     | 6.75±0.21                      | 6.92±0.31                     | 6.96±0.23                     | 2.34±4.16      | 2.99±4.35       | 6.86±0.30                       | 6.89±0.25                     | 6.83±0.30                      | 0.59±3.17      | -0.28±5.14      |
| 90 <sup>th</sup> percentile | <b>1.85±0.29<sup>**</sup></b>  | <b>2.09±0.29<sup>*†</sup></b> | <b>2.25±0.25<sup>#</sup></b>  | 13.84±12.71    | 24.06±22.05     | <b>2.02±0.43<sup>**</sup></b>   | <b>2.29±0.32<sup>*†</sup></b> | <b>2.32±0.30<sup>#</sup></b>   | 17.37±22.31    | 18.61±23.85     |
| 75 <sup>th</sup> percentile | <b>1.53±0.32<sup>**</sup></b>  | <b>1.82±0.30<sup>*</sup></b>  | <b>2.0±0.22<sup>#</sup></b>   | 21.41±19.03    | 34.96±24.76     | <b>1.68±0.42<sup>**</sup></b>   | <b>2.03±0.35<sup>*</sup></b>  | <b>2.06±0.33<sup>#</sup></b>   | 26.58±33.75    | 29.06±35.63     |
| 60 <sup>th</sup> percentile | <b>1.33±0.32<sup>**</sup></b>  | <b>1.64±0.30<sup>*</sup></b>  | <b>1.81±0.21<sup>#</sup></b>  | 25.74±23.33    | 40.66±25.29     | <b>1.47±0.41<sup>**</sup></b>   | <b>1.85±0.36<sup>*</sup></b>  | <b>1.86±0.33<sup>#</sup></b>   | 32.76±38.60    | 34.40±41.31     |
| 50 <sup>th</sup> percentile | <b>1.23±0.32<sup>**</sup></b>  | <b>1.53±0.30<sup>*</sup></b>  | <b>1.69±0.21<sup>#</sup></b>  | 27.69±25.83    | 42.44±25.58     | <b>1.36±0.39<sup>**</sup></b>   | <b>1.74±0.36<sup>*</sup></b>  | <b>1.75±0.34<sup>#</sup></b>   | 35.38±39.57    | 36.85±43.16     |
| 25 <sup>th</sup> percentile | <b>1.02±0.30<sup>**</sup></b>  | <b>1.24±0.29<sup>*</sup></b>  | <b>1.33±0.26<sup>#</sup></b>  | 26.39±30.32    | 36.61±27.78     | <b>1.10±0.33<sup>**</sup></b>   | <b>1.68±0.29<sup>*</sup></b>  | <b>1.46±0.35<sup>#</sup></b>   | 39.81±39.54    | 41.62±46.13     |
| <b>D</b>                    |                                |                               |                               |                |                 |                                 |                               |                                |                |                 |
| Mean                        | <b>1.21±0.28<sup>**</sup></b>  | <b>1.44±0.28<sup>*†</sup></b> | <b>1.57±0.20<sup>#</sup></b>  | 21.63±27.15    | 33.08±18.73     | <b>1.35±0.32<sup>**</sup></b>   | <b>1.68±0.29<sup>*†</sup></b> | <b>1.66±0.27<sup>#</sup></b>   | 28.68±28.12    | 27.60±29.48     |
| SD (10 <sup>-1</sup> )      | 4.5±1.1                        | 4.65±1.0                      | 4.75±1.05                     | 6.56±17.91     | 11.76±36.99     | 4.5±1.2                         | 4.32±1.1                      | 4.3±1.1                        | -0.89±20.32    | 0.44±28.20      |
| Skewness                    | <b>0.62±0.48<sup>**</sup></b>  | <b>0.03±0.64<sup>*</sup></b>  | <b>-0.23±0.51<sup>#</sup></b> | -155.8±163.35  | -207.8±293.9    | <b>0.54±0.74<sup>**</sup></b>   | <b>-0.12±0.76<sup>*</sup></b> | <b>-0.31±0.51<sup>#</sup></b>  | -282.67±142.9  | -179.4±299.5    |
| Kurtosis                    | 4.23±1.50                      | 3.97±1.10                     | 3.82±0.88                     | 1.23±33.61     | -1.81±34.60     | 4.81±2.48                       | 4.72±1.96                     | 4.22±1.54                      | 10.71±49.92    | 0.08±40.74      |
| Energy (10 <sup>-3</sup> )  | 1.77±3.5                       | 1.45±0.59                     | 1.31±0.35                     | 0.02±57.67     | -11.24±37.64    | 2.24±2.96                       | 1.45±0.48                     | 1.54±0.63                      | -8.49±37.96    | -3.0±47.75      |
| Entropy                     | 6.64±0.51                      | 6.86±0.19                     | 6.83±0.25                     | 4.01±10.68     | 3.67±11.06      | 6.75±0.27                       | 6.79±0.34                     | 6.73±0.36                      | 0.58±4.45      | -0.19±5.58      |
| 90 <sup>th</sup> percentile | <b>1.80±0.22<sup>**</sup></b>  | <b>2.01±0.23<sup>*†</sup></b> | <b>2.13±0.19<sup>#</sup></b>  | 12.31±12.48    | 20.08±17.51     | <b>1.93±0.36<sup>**</sup></b>   | <b>2.21±0.28<sup>*†</sup></b> | <b>2.19±0.24<sup>#</sup></b>   | 16.59±18.50    | 15.79±18.62     |
| 75 <sup>th</sup> percentile | <b>1.47±0.28<sup>**</sup></b>  | <b>1.74±0.27<sup>*†</sup></b> | <b>1.89±0.18<sup>#</sup></b>  | 19.95±18.97    | 31.57±19.76     | <b>1.62±0.37<sup>**</sup></b>   | <b>1.96±0.31<sup>*†</sup></b> | <b>1.96±0.27<sup>#</sup></b>   | 24.89±28.43    | 25.01±28.28     |
| 60 <sup>th</sup> percentile | <b>1.27±0.29<sup>**</sup></b>  | <b>1.56±0.30<sup>*†</sup></b> | <b>1.72±0.19<sup>#</sup></b>  | 24.99±24.22    | 38.88±20.91     | <b>1.42±0.36<sup>**</sup></b>   | <b>1.79±0.33<sup>*†</sup></b> | <b>1.78±0.3<sup>#</sup></b>    | 31.46±33.60    | 31.14±35.19     |
| 50 <sup>th</sup> percentile | <b>1.16±0.30<sup>**</sup></b>  | <b>1.45±0.31<sup>*†</sup></b> | <b>1.60±0.21<sup>#</sup></b>  | 27.41±27.76    | 42.04±21.63     | <b>1.32±0.35<sup>**</sup></b>   | <b>1.69±0.33<sup>*†</sup></b> | <b>1.68±0.31<sup>#</sup></b>   | 34.43±35.34    | 34.02±38.21     |
| 25 <sup>th</sup> percentile | <b>0.89±0.38<sup>**</sup></b>  | <b>1.13±0.34<sup>*†</sup></b> | <b>1.27±0.26<sup>#</sup></b>  | 104.38±305.1   | 93.08±183.54    | <b>1.05±0.32<sup>**</sup></b>   | <b>1.42±0.32<sup>*†</sup></b> | <b>1.40±0.32<sup>#</sup></b>   | 41.94±40.99    | 41.68±46.89     |
| <b>D*</b>                   |                                |                               |                               |                |                 |                                 |                               |                                |                |                 |
| Mean                        | <b>23.76±7.56<sup>**</sup></b> | 19.77±4.20                    | <b>17.76±6.02<sup>#</sup></b> | -14.86±26.63   | -18.93±32.52    | <b>30.95±10.80<sup>**</sup></b> | 25.32±12.47                   | <b>23.44±10.65<sup>#</sup></b> | -10.45±50.65   | -20.05±31.78    |
| SD                          | 23.69±4.26                     | 21.93±3.09                    | 20.46±5.12                    | -5.41±18.57    | -9.84±33.56     | 26.01±3.24                      | 22.38±6.18                    | 22.22±5.96                     | -12.27±27.46   | -13.40±23.41    |
| Skewness                    | <b>1.10±0.60<sup>†</sup></b>   | 1.42±0.51                     | 1.65±0.68                     | 73.99±133.01   | 132.6±253.8     | <b>0.67±0.65<sup>†</sup></b>    | 1.23±1.07                     | 1.20±0.70                      | 44.18±208.63   | 227.9±334.8     |

|                             |                                 |             |                                |              |              |                                 |                                |                                |               |              |
|-----------------------------|---------------------------------|-------------|--------------------------------|--------------|--------------|---------------------------------|--------------------------------|--------------------------------|---------------|--------------|
| Kurtosis                    | 3.58±1.79                       | 4.48±2.43   | 5.76±3.50                      | 38.03±51.79  | 100.8±145.6  | 2.61±1.30                       | 5.21±5.41                      | 4.19±2.54                      | 129.01±260.22 | 72.93±102.28 |
| Energy (10 <sup>-3</sup> )  | 0.41±0.32                       | 0.71±1.09   | 0.65±0.51                      | 108.52±385.9 | 186.2±233.5  | 1.15±3.51                       | 0.34±0.37                      | 0.44±0.51                      | 130.21±140.1  | 225.2±238.9  |
| Entropy                     | <b>8.46±0.89<sup>†</sup></b>    | 8.67±0.67   | 8.12±0.80                      | 3.75±16.59   | -3.51±9.71   | <b>9.08±0.78<sup>†</sup></b>    | 8.86±0.91                      | 8.58±0.91                      | -2.0±11.32    | -5.01±11.69  |
| 90 <sup>th</sup> percentile | <b>60.28±14.15<sup>#†</sup></b> | 55.43±10.33 | <b>49.59±16.35<sup>#</sup></b> | -3.40±29.10  | -11.58±41.65 | <b>70.64±11.25<sup>#†</sup></b> | <b>58.28±21.58<sup>*</sup></b> | <b>57.91±18.58<sup>#</sup></b> | -14.92±35.63  | -16.42±26.76 |
| 75 <sup>th</sup> percentile | <b>38.71±15.69<sup>#†</sup></b> | 29.72±9.16  | <b>26.26±13.31<sup>#</sup></b> | -15.19±34.12 | -22.43±45.68 | <b>49.85±16.69<sup>#†</sup></b> | <b>39.18±21.74<sup>*</sup></b> | <b>36.05±17.79<sup>#</sup></b> | -11.84±60.03  | -22.83±34.95 |
| 60 <sup>th</sup> percentile | <b>23.14±11.82<sup>#</sup></b>  | 15.86±6.91  | <b>14.16±8.41<sup>#</sup></b>  | -16.42±44.01 | -27.30±43.79 | <b>33.56±18.27<sup>#†</sup></b> | <b>26.14±18.33<sup>*</sup></b> | <b>22.43±15.41<sup>#</sup></b> | 7.08±117.93   | -18.99±60.46 |
| 50 <sup>th</sup> percentile | 14.92±9.14                      | 10.29±5.61  | 8.84±5.27                      | -10.11±57.92 | -23.05±49.48 | 24.56±17.04                     | 19.33±15.42                    | 15.96±13.65                    | 31.19±94.92   | -10.66±73.38 |
| 25 <sup>th</sup> percentile | 4.28±3.74                       | 3.53±2.26   | 2.97±1.77                      | -8.39±41.27  | -12.49±78.23 | 8.35±8.54                       | 6.97±6.84                      | 5.75±5.95                      | 95.94±179.54  | 26.62±164.04 |

|                             |                              |            |            |             |             |                              |                              |            |              |              |
|-----------------------------|------------------------------|------------|------------|-------------|-------------|------------------------------|------------------------------|------------|--------------|--------------|
| <b>f</b>                    |                              |            |            |             |             |                              |                              |            |              |              |
| Mean                        | 13.31±2.68                   | 13.36±2.04 | 12.55±1.24 | 3.15±20.28  | -2.16±21.90 | 14.05±2.99                   | 12.89±2.69                   | 13.22±2.54 | -5.56±21.42  | -2.74±23.86  |
| SD                          | 8.25±2.63                    | 8.12±3.30  | 7.68±1.73  | -0.16±25.84 | -2.62±45.07 | <b>8.53±3.21<sup>*</sup></b> | <b>6.81±1.98<sup>*</sup></b> | 7.12±1.74  | -14.22±26.75 | -6.61±33.21  |
| Skewness                    | 0.95±0.33                    | 1.03±0.30  | 1.07±0.42  | 15.49±40.23 | 23.49±53.03 | 1.08±0.41                    | 0.96±0.43                    | 1.08±0.47  | 21.08±132.94 | 72.87±119.23 |
| Kurtosis                    | 4.82±2.07                    | 5.19±1.55  | 5.52±2.59  | 14.13±29.17 | 21.92±46.09 | 5.34±1.67                    | 5.40±2.12                    | 5.86±2.05  | 9.14±55.91   | 18.66±54.38  |
| Energy (10 <sup>-3</sup> )  | 0.19±0.10                    | 0.26±0.30  | 0.30±0.20  | 50.48±219.6 | 83.85±156.6 | 0.48±0.95                    | 0.21±0.23                    | 0.29±0.23  | 29.51±137.5  | 133.6±160.6  |
| Entropy                     | <b>8.66±0.90<sup>†</sup></b> | 9.07±0.77  | 8.53±0.74  | 6.13±19.05  | -0.96±8.74  | <b>9.06±0.69<sup>†</sup></b> | 8.99±0.81                    | 8.64±0.79  | -0.54±7.27   | -4.33±8.77   |
| 90 <sup>th</sup> percentile | 24.17±5.86                   | 23.69±6.22 | 22.02±4.37 | -0.86±17.02 | -5.25±27.98 | 25.06±6.45                   | 21.53±5.15                   | 22.33±4.55 | -10.24±23.92 | -5.81±27.49  |
| 75 <sup>th</sup> percentile | 18.24±3.95                   | 18.00±3.93 | 16.54±2.54 | 0.08±16.37  | -6.26±22.61 | 18.68±4.26                   | 16.81±3.94                   | 17.21±3.42 | -7.11±22.73  | -4.01±25.48  |
| 60 <sup>th</sup> percentile | 14.48±2.94                   | 14.32±2.04 | 13.44±1.45 | 1.59±19.34  | -3.82±21.75 | 14.92±3.45                   | 13.92±3.14                   | 14.17±2.97 | -3.79±22.73  | -1.52±25.72  |
| 50 <sup>th</sup> percentile | 12.23±2.67                   | 12.24±1.37 | 11.70±0.92 | 4.90±28.05  | 0.63±26.91  | 12.82±3.08                   | 12.24±2.75                   | 12.43±2.76 | -1.56±22.85  | 0.39±26.42   |
| 25 <sup>th</sup> percentile | 7.07±2.13                    | 7.12±1.84  | 7.03±1.02  | 6.31±35.30  | 8.21±35.73  | 7.77±2.32                    | 7.83±2.4                     | 7.89±2.30  | 5.93±26.07   | 8.60±33.03   |

|                             |                               |                              |                              |               |                |                                |                               |                              |               |                |
|-----------------------------|-------------------------------|------------------------------|------------------------------|---------------|----------------|--------------------------------|-------------------------------|------------------------------|---------------|----------------|
| <b>D*, f</b>                |                               |                              |                              |               |                |                                |                               |                              |               |                |
|                             | <b>t0</b>                     | <b>t1</b>                    | <b>t2</b>                    | <b>ΔI (%)</b> | <b>ΔII (%)</b> | <b>t0</b>                      | <b>t1</b>                     | <b>t2</b>                    | <b>ΔI (%)</b> | <b>ΔII (%)</b> |
| Mean                        | <b>3.85±1.90<sup>#</sup></b>  | <b>2.97±1.02<sup>†</sup></b> | <b>2.53±1.37<sup>#</sup></b> | -12.12±34.90  | -26.64±49.64   | <b>5.12±2.52<sup>#†</sup></b>  | <b>4.49±2.31<sup>*†</sup></b> | <b>3.50±1.86<sup>#</sup></b> | -4.90±39.22   | -23.72±30.43   |
| SD                          | 4.97±2.15                     | 4.37±1.81                    | 4.32±1.73                    | -6.30±35.25   | 3.72±73.41     | 5.81±1.76                      | 4.30±1.80                     | 4.36±1.47                    | -21.66±32.99  | -19.48±28.79   |
| Skewness                    | 2.80±1.11                     | 3.24±0.84                    | 3.40±0.64                    | 25.69±38.05   | 37.82±58.30    | 2.27±0.93                      | 2.91±1.44                     | 3.02±0.83                    | 47.80±105.12  | 53.84±77.26    |
| Kurtosis                    | 15.86±10.10                   | 19.33±8.32                   | 19.68±6.84                   | 52.05±82.71   | 78.81±145.24   | 11.33±7.16                     | 18.68±14.77                   | 17.46±7.33                   | 123.9±252.6   | 105.75±141.12  |
| Energy (10 <sup>-3</sup> )  | 3.82±3.73                     | 4.97±7.40                    | 4.32±2.63                    | 74.54±214.8   | 155.5±240.8    | 3.08±4.57                      | 2.68±2.85                     | 2.56±2.11                    | 161.8±379.8   | 167.7±308.8    |
| Entropy                     | <b>6.88±0.85<sup>#†</sup></b> | 6.88±0.42                    | <b>6.54±0.62<sup>#</sup></b> | 1.47±15.12    | -4.02±11.26    | <b>7.55±0.78<sup>#†</sup></b>  | 7.16±0.87                     | <b>6.96±0.63<sup>#</sup></b> | -4.31±14.53   | -7.12±10.70    |
| 90 <sup>th</sup> percentile | 10.02±5.69                    | 8.34±3.88                    | 7.46±3.57                    | -3.50±42.69   | -2.60±75.03    | <b>12.55±5.09<sup>#†</sup></b> | <b>9.49±4.73<sup>*</sup></b>  | <b>8.31±3.95<sup>#</sup></b> | -16.58±44.47  | -25.03±39.12   |
| 75 <sup>th</sup> percentile | 5.29±3.21                     | 4.67±2.42                    | 3.37±1.81                    | -8.80±42.62   | -16.43±60.41   | <b>7.21±4.02<sup>#†</sup></b>  | <b>5.3±3.74<sup>*</sup></b>   | <b>4.50±2.96<sup>#</sup></b> | -8.90±59.83   | -25.64±41.71   |
| 60 <sup>th</sup> percentile | <b>2.92±1.85<sup>#</sup></b>  | 1.97±0.60                    | <b>1.71±0.91<sup>#</sup></b> | -8.55±47.75   | -22.54±45.61   | <b>4.50±3.23<sup>#</sup></b>   | 3.43±3.02                     | <b>2.68±2.31<sup>#</sup></b> | 3.58±88.45    | -24.29±43.92   |
| 50 <sup>th</sup> percentile | 1.87±1.33                     | 1.24±0.49                    | 1.05±0.52                    | -0.67±68.67   | -19.29±51.46   | <b>3.17±2.63<sup>#</sup></b>   | 2.49±2.50                     | <b>1.90±1.91<sup>#</sup></b> | 15.9±118.5    | -19.27±53.82   |
| 25 <sup>th</sup> percentile | 0.50±0.50                     | 0.41±0.29                    | <b>0.30±0.22<sup>†</sup></b> | -0.56±75.27   | -16.38±85.26   | 0.98±1.06                      | 0.84±1.11                     | <b>0.69±0.81<sup>†</sup></b> | 26.74±133.16  | 54.38±136.22   |

Mean, SD (Standard-Deviation), 90<sup>th</sup>, 70<sup>th</sup>, 50<sup>th</sup> and 25<sup>th</sup> percentiles values of ADC, D, D\* and D\*f are in x10<sup>-3</sup>mm<sup>2</sup>/s; Mean, SD (Standard-Deviation), 90<sup>th</sup>, 70<sup>th</sup>, 50<sup>th</sup> and 25<sup>th</sup> percentiles values of f are in percentage (%).

\* Intra-group significant change (p<0.05) according to paired t-test between time point t0 and t1

# Intra-group significant change (p<0.05) according to paired t-test between time point t0 and t2

† Inter-group significant difference (p<0.05) according to independent sample t test at individual time points t0, t1 and t2

**Table S2:** Variance inflation factor (VIF), Harrell's c-index and the corresponding generalization of Somers' *D* rank correlation (SDRC) for statistically significant ( $p < 0.05$ ) imaging parameters by univariate cox regression analyses for association with Event free survival (EFS) in patient cohort.

| Parameters                                               | VIF score | c-index | SDRC   | p-value |
|----------------------------------------------------------|-----------|---------|--------|---------|
| <b>Derived from Apparent diffusion coefficient (ADC)</b> |           |         |        |         |
| ADC-Mean                                                 | 1587      | 0.640   | 0.279  | 0.046   |
| ADC-90 <sup>th</sup> percentile                          | 220       | 0.630   | 0.260  | 0.050   |
| ADC-75 <sup>th</sup> percentile                          | 1613      | 0.626   | 0.252  | 0.081   |
| ADC-60 <sup>th</sup> percentile                          | 8336      | 0.632   | 0.264  | 0.061   |
| ADC-50 <sup>th</sup> percentile                          | 4825      | 0.62    | 0.241  | 0.087   |
| ADC-25 <sup>th</sup> percentile                          | 759       | 0.644   | 0.287  | 0.049   |
| <b>Derived from Diffusion coefficient (D)</b>            |           |         |        |         |
| D-Mean                                                   | 336       | 0.642   | 0.283  | 0.049   |
| D-90 <sup>th</sup> percentile                            | 95        | 0.640   | 0.279  | 0.040   |
| D-75 <sup>th</sup> percentile                            | 1172      | 0.620   | 0.241  | 0.099   |
| D-60 <sup>th</sup> percentile                            | 4822      | 0.636   | 0.272  | 0.069   |
| D-50 <sup>th</sup> percentile                            | 2442      | 0.632   | 0.264  | 0.081   |
| D-25 <sup>th</sup> percentile                            | 70        | 0.624   | 0.249  | 0.085   |
| <b>Derived from Perfusion coefficient (D*)</b>           |           |         |        |         |
| D*-Mean                                                  | 396       | 0.322   | -0.356 | 0.001   |
| D*-skewness                                              | 35        | 0.678   | 0.356  | 0.001   |
| D*-75 <sup>th</sup> percentile                           | 380       | 0.322   | -0.356 | 0.001   |
| D*-60 <sup>th</sup> percentile                           | 715       | 0.339   | -0.322 | 0.004   |
| D*-50 <sup>th</sup> percentile                           | 821       | 0.335   | -0.329 | 0.003   |
| D*-25 <sup>th</sup> percentile                           | 44        | 0.337   | -0.326 | 0.003   |
| D*.f-60 <sup>th</sup> percentile                         | 297       | 0.356   | -0.287 | 0.014   |
| D*.f-50 <sup>th</sup> percentile                         | 467       | 0.366   | -0.268 | 0.017   |
| D*.f-25 <sup>th</sup> percentile                         | 32        | 0.331   | -0.337 | 0.003   |

**Table S3:** Variance inflation factor (VIF), Harrell's c-index and the corresponding generalization of Somers' *D* rank correlation (SDRC) for statistically significant ( $p < 0.05$ ) imaging parameters by univariate cox regression analyses for association with Overall survival (OS) in patient cohort.

| Parameters                                               | VIF score | c-index | SDRC   | p-value    |
|----------------------------------------------------------|-----------|---------|--------|------------|
| <b>Derived from Apparent diffusion coefficient (ADC)</b> |           |         |        |            |
| ---                                                      |           |         |        |            |
| <b>Derived from Diffusion coefficient (D)</b>            |           |         |        |            |
| ---                                                      |           |         |        |            |
| <b>Derived from Perfusion coefficient (D*)</b>           |           |         |        |            |
| D*-Mean                                                  | 5563      | 0.308   | -0.385 | $<10^{-3}$ |
| D*-skewness                                              | 80        | 0.676   | 0.351  | 0.002      |
| D*-90 <sup>th</sup> percentile                           | 266       | 0.312   | -0.375 | 0.004      |
| D*-75 <sup>th</sup> percentile                           | 600       | 0.308   | -0.385 | 0.001      |
| D*-60 <sup>th</sup> percentile                           | 1437      | 0.356   | -0.288 | 0.012      |
| D*-50 <sup>th</sup> percentile                           | 1247      | 0.349   | -0.303 | 0.010      |
| D*-25 <sup>th</sup> percentile                           | 262       | 0.341   | -0.317 | 0.006      |
| D*.f-skewness                                            | 103       | 0.630   | 0.259  | 0.060      |
| D*.f-kurtosis                                            | 59        | 0.627   | 0.254  | 0.055      |
| D*.f-entropy                                             | 5         | 0.349   | -0.303 | 0.016      |
| D*.f-60 <sup>th</sup> percentile                         | 372       | 0.368   | -0.264 | 0.025      |
| D*.f-50 <sup>th</sup> percentile                         | 598       | 0.361   | -0.278 | 0.014      |
| D*.f-25 <sup>th</sup> percentile                         | 37        | 0.339   | -0.322 | 0.003      |

**Fig. S1:** Hazard ratio Forest plot for multivariate cox regression analysis in patient cohort (n=35) for Event free survival (EFS) for a) EFS-Model-1 and b) EFS-Model-2.

**a. Hazard ratio for event free survival analysis for EFS-Model-1**

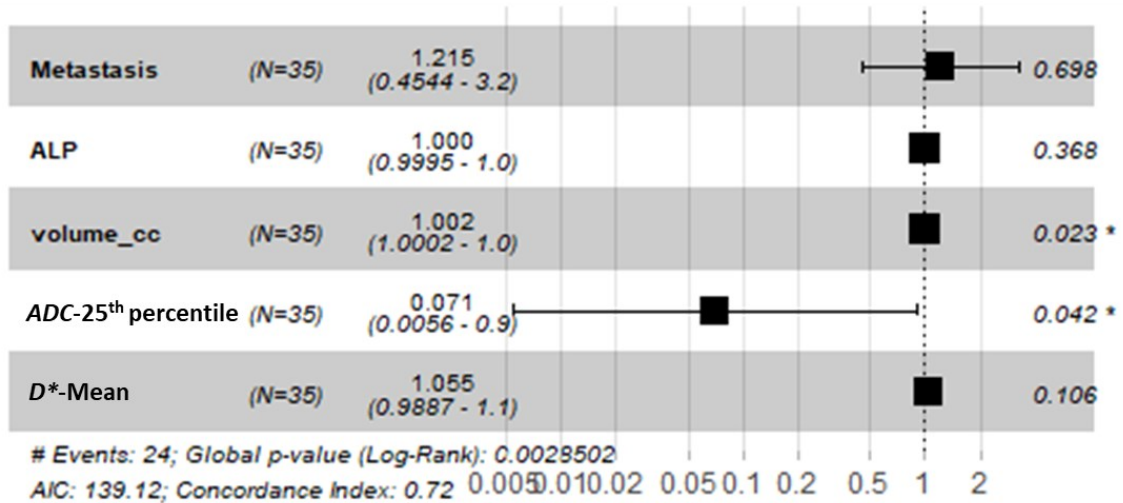

**b. Hazard ratio for event free survival analysis for EFS-Model-2**

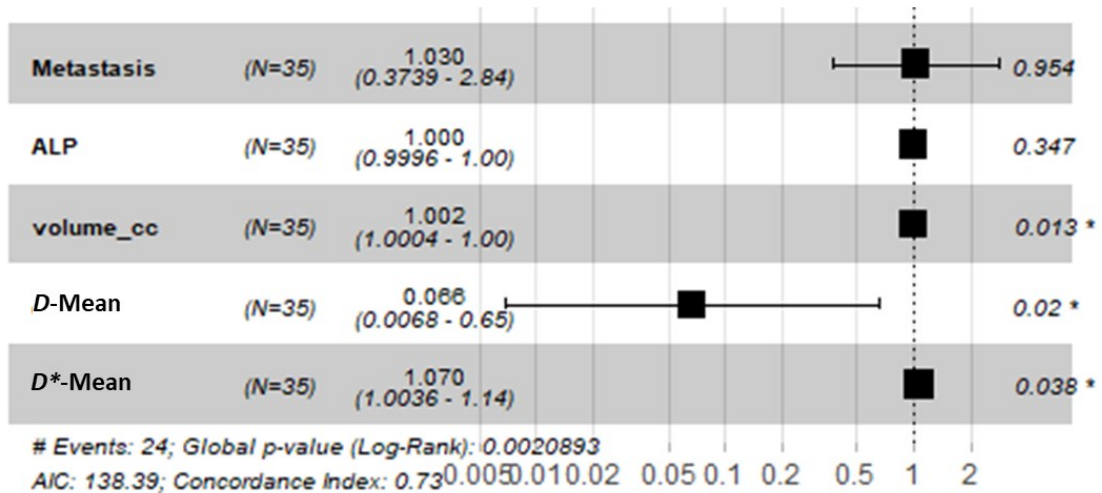

**Fig. S2:** Schoenfeld residual test to check proportional hazard function for Event free survival (EFS) for a) EFS-Model-1 (Tumour-volume,  $ADC$ -25<sup>th</sup> percentile) and b) EFS-Model-2 (Tumour-volume,  $D$ -Mean,  $D^*$ -Mean). This test infers that the hazards run proportionally to each other when the  $p$ -values are large ( $p > 0.05$ ). The proportionality assumption is met for both the models as all covariates are between the residuals and the parallel lines. (volume\_cc: Tumour-volume; adc12:  $ADC$ -25<sup>th</sup> percentile; d1:  $D$ -Mean; dp1:  $D^*$ -Mean).

**a. EFS-Model-1**

Global Schoenfeld Test p: 0.5729

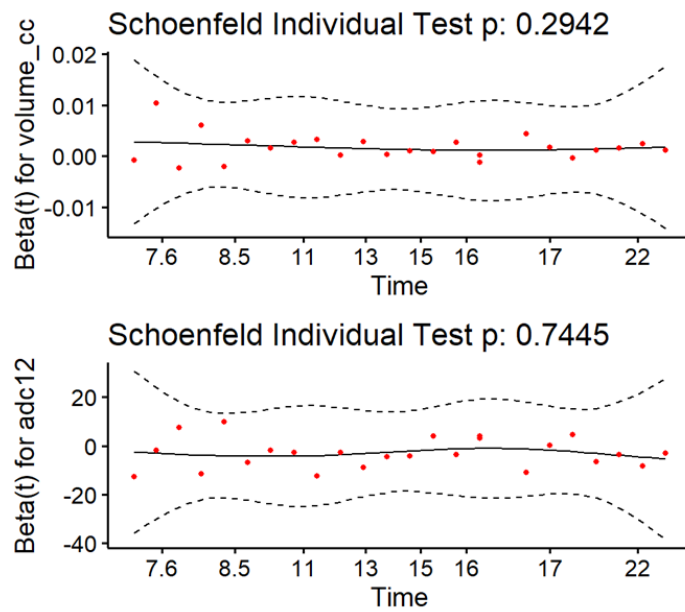

**b. EFS-Model-2**

Global Schoenfeld Test p: 0.1886

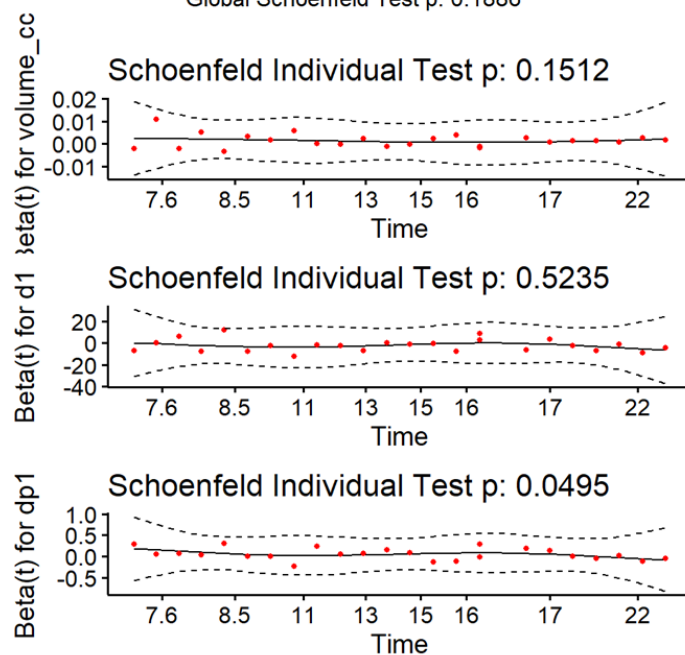

**Fig. S3:** Hazard ratio Forest plot for multivariate cox regression analysis in patient cohort (n=35) for overall survival (OS) for a) OS-Model-1 and b) OS-Model-2.

**a. Hazard ratio for overall survival analysis for OS-Model-1**

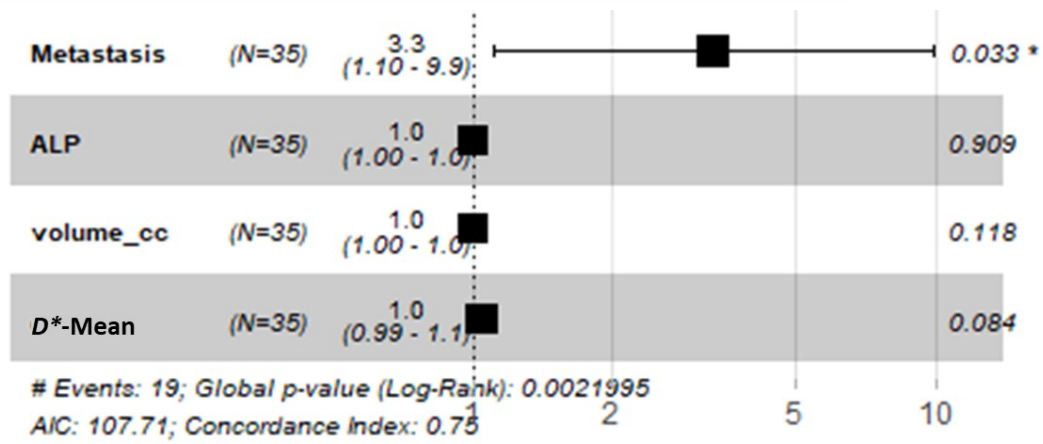

**b. Hazard ratio for overall survival analysis for OS-Model-2**

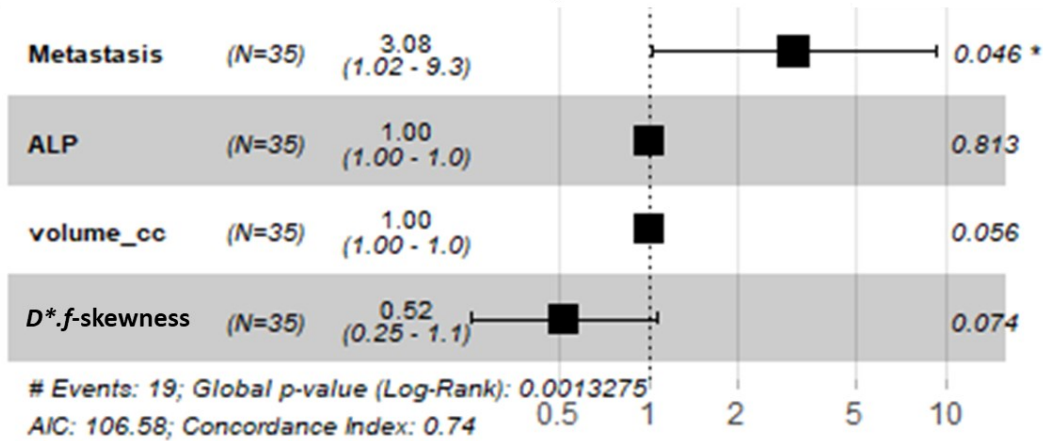

**Fig. S4:** Schoenfeld residual test to check proportional hazard function for Overall survival (OS) for a) OS-Model-1 (Metastasis,  $D^*$ -Mean) and b) OS-Model-2 (Metastasis, Tumour-volume,  $D^*$ -Skewness). This test infers that the hazards run proportionally to each other when the  $p$ -values are large ( $p > 0.05$ ). The proportionality assumption is met for both the models as all covariates are between the residuals and the parallel lines. (volume\_cc: Tumour-volume; dp1:  $D^*$ -Mean; dpf4:  $D^*$ -Skewness).

**a. OS-Model-1**

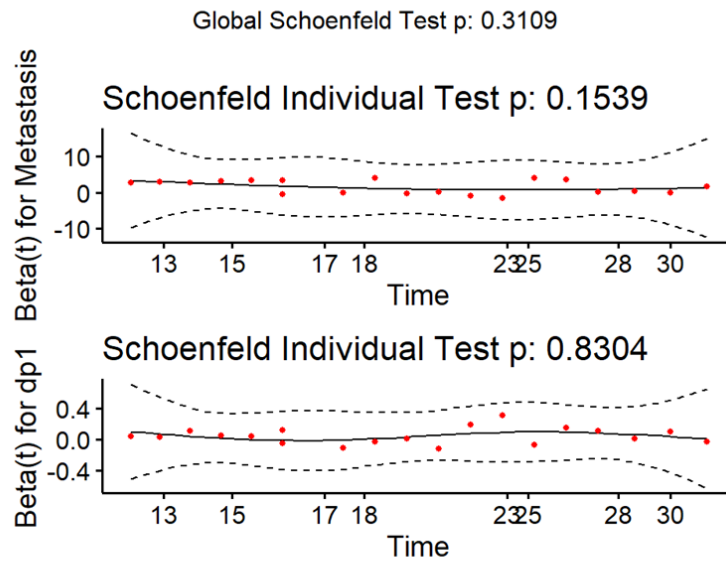

**b. OS-Model-2**

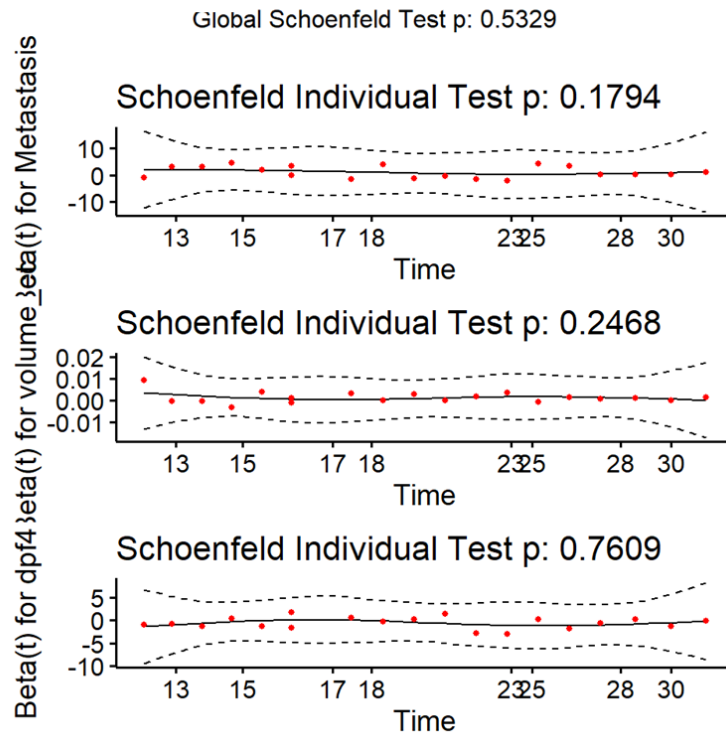

Supplement: MOESM1 [file 23861218]
